# Supplementary material for: Diagonal earlobe crease and long-term survival after myocardial infarction
Source: Springer Nature journal article supplement (doi:10.1186/s12872-021-02425-4), 2021-12-01
Supplement: MOESM1 [file 12872_2021_2425_MOESM1_ESM.pdf › 12872_2021_2425_MOESM1_ESM.pdf]

Angiographic findings within the study population with (grade 2/3) and without (grade 0/1) diagonal earlobe crease (DEC) (n=655)

|                           | Total |       | DEC 0/1 |       | DEC 2/3 |       | p-value |        |
|---------------------------|-------|-------|---------|-------|---------|-------|---------|--------|
|                           | n     | %     | n       | %     | n       | %     |         |        |
| 1-VD                      | 167   | 26.13 | 59      | 27.96 | 108     | 25.23 | 0.1543  |        |
| 2-VD                      | 190   | 29.73 | 71      | 33.65 | 119     | 27.80 |         |        |
| 3-VD                      | 265   | 41.47 | 76      | 36.02 | 189     | 44.16 |         |        |
| Main stem affection       | 14    | 2.19  | 3       | 1.42  | 11      | 2.57  |         |        |
| LIR / no CAD              | 3     | 0.47  | 2       | 0.95  | 1       | 0.23  |         |        |
| Coronary artery dominance |       |       |         |       |         |       |         |        |
| left                      | 60    | 12.99 | 25      | 15.82 | 35      | 11.51 | 0.3257  |        |
| right                     | 62    | 13.42 | 18      | 11.39 | 44      | 14.47 |         |        |
| codominant                | 340   | 73.59 | 115     | 72.78 | 225     | 74.01 |         |        |
| Stent PCI                 | 367   | 78.92 | 129     | 81.13 | 238     | 77.78 |         | 0.4002 |
| Number of stents          |       |       |         |       |         |       |         |        |
| 1                         | 184   | 50.27 | 57      | 44.19 | 127     | 53.59 | 0.3322  |        |
| 2                         | 114   | 31.15 | 44      | 34.11 | 70      | 29.54 |         |        |
| 3                         | 41    | 11.20 | 18      | 13.95 | 23      | 9.70  |         |        |
| >= 4                      | 27    | 7.38  | 10      | 7.75  | 17      | 7.17  |         |        |
| % stenosis                |       |       |         |       |         |       |         |        |
| Main stem                 |       |       |         |       |         |       |         |        |
| 0                         | 381   | 81.76 | 137     | 86.16 | 244     | 79.48 | 0.1721  |        |
| 1 to 50                   | 47    | 10.09 | 15      | 9.43  | 32      | 10.42 |         |        |
| 51-99                     | 37    | 7.94  | 7       | 4.40  | 30      | 9.77  |         |        |
| 100                       | 1     | 0.21  | 0       | 0     | 1       | 0.33  |         |        |
| LAD                       |       |       |         |       |         |       |         |        |
| 0                         | 84    | 18.03 | 31      | 19.5  | 53      | 17.26 | 0.5077  |        |
| 1 to 50                   | 59    | 12.66 | 24      | 15.09 | 35      | 11.40 |         |        |
| 51-99                     | 237   | 50.86 | 74      | 46.54 | 163     | 53.00 |         |        |
| 100                       | 86    | 18.45 | 30      | 18.87 | 56      | 18.24 |         |        |
| RCA                       |       |       |         |       |         |       |         |        |
| 0                         | 118   | 25.38 | 41      | 25.95 | 77      | 25.08 | 0.6703  |        |
| 1 to 50                   | 47    | 10.11 | 14      | 8.86  | 33      | 10.75 |         |        |
| 51-99                     | 165   | 35.48 | 61      | 38.61 | 104     | 33.88 |         |        |
| 100                       | 135   | 29.03 | 42      | 26.58 | 93      | 30.29 |         |        |
| CFX                       |       |       |         |       |         |       |         |        |
| 0                         | 153   | 32.9  | 54      | 34.18 | 99      | 32.25 | 0.022   |        |
| 1 to 50                   | 53    | 11.40 | 27      | 17.09 | 26      | 8.47  |         |        |
| 51-99                     | 193   | 41.51 | 60      | 37.97 | 133     | 43.32 |         |        |
| 100                       | 66    | 14.19 | 17      | 10.76 | 49      | 15.96 |         |        |

VD: vessel disease; LIR: luminal irregularities; LAD: left anterior descending artery; RCA: right coronary artery; CFX: circumflex artery
